# Supplementary material
Source: Springer Nature journal article supplement (https://www.springermedizin.de/resource/supplementary/12931_2010_1589_MOESM3_ESM.pdf/10243328)

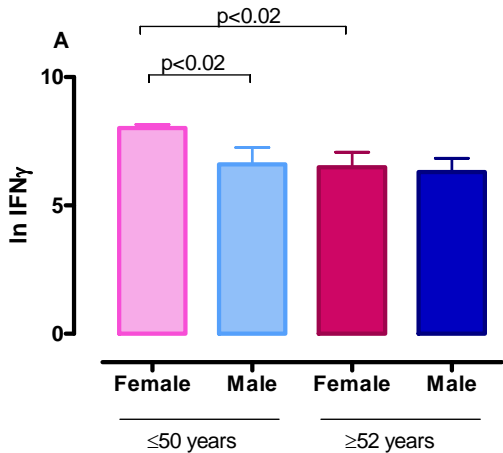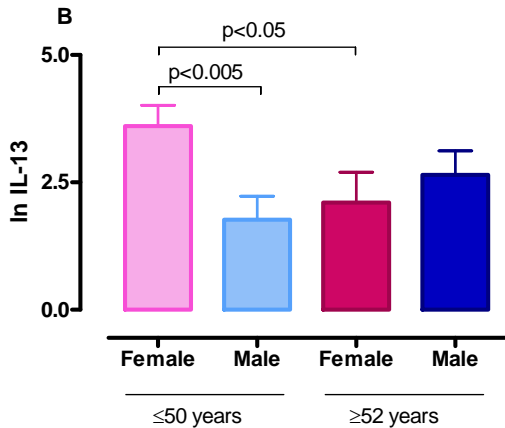

Supplement: MOESM3 [file 10243328]
